# Supplementary material for: MEF2 transcription factors are key regulators of sprouting angiogenesis
Source: PubMed Central journal article supplement (PMC5110996; doi:10.1101/gad.290619.116), 2016-10-15
Supplement: supp_30.20.2297_Supplemental_Tables.pdf [file supp_30.20.2297_Supplemental_Tables.pdf]

### **Supplemental Table 1**

Locations of statistically significant MEF2 binding peaks 200bp around tip-cell enriched genes (human genes orthologous to original mouse genes identified by del Toro et al., 2010)

| Human Gene Name (HUGO symbol) | Location of MEF2C binding peak (hg19) |
|-------------------------------|---------------------------------------|
| ABCB1                         |                                       |
| ABCC9                         |                                       |
| ABCG2                         |                                       |
| ACKR2                         |                                       |
| ACKR3                         |                                       |
| ACVRL1                        |                                       |
| ADAMTS1                       |                                       |
| ADAMTS16                      |                                       |
| ADAMTS9                       |                                       |
| ADGRL4                        |                                       |
| ADH1C                         |                                       |
| ADM                           |                                       |
| AKAP12                        |                                       |
| AKAP2                         |                                       |
| ANGPT2                        |                                       |
| ANTXR2                        |                                       |
| ANXA1                         |                                       |
| ANXA2                         |                                       |
| ANXA3                         |                                       |
| ANXA6                         |                                       |
| AOC3                          |                                       |
| APBB1IP                       |                                       |
| APLN                          | chrX:128,788,328-128,788,527          |
| AQP1                          | chr7:30,960,780-30,960,979            |
| ARAP3                         |                                       |
| ARHGAP18                      |                                       |
| ARHGAP25                      |                                       |
| ARHGAP29                      |                                       |
| ARHGDIB                       |                                       |
| ART3                          |                                       |
| ASPN                          |                                       |
| B2M                           |                                       |
| B3GNT2                        |                                       |
| BAG3                          |                                       |
| BCL6B                         |                                       |
| BST2                          |                                       |
| C10ORF10                      | chr10:45,474,368-45,474,567           |
| C1ORF54                       |                                       |
| C1QC                          |                                       |
| C1QTNF6                       |                                       |
| C4ORF32                       |                                       |
| C8ORF4                        |                                       |
| C9ORF3                        |                                       |
| CAPG                          |                                       |
| CASP4                         |                                       |
| CASP8                         |                                       |
| CAST                          |                                       |
| CAV1                          |                                       |
| CAV2                          |                                       |
| CCL2                          |                                       |
| CCL3                          |                                       |
| CCL4                          |                                       |
| CCL7                          |                                       |
| CCRL2                         |                                       |
| CD109                         |                                       |
| CD248                         |                                       |
| CD302                         |                                       |
| CD38                          |                                       |
| CD40                          |                                       |
| CDH13                         |                                       |
| CEBPB                         |                                       |
| CHST1                         |                                       |
| CHST11                        |                                       |
| CHST14                        |                                       |
| CHST7                         |                                       |
| CLEC1A                        |                                       |
| CLEC2D                        |                                       |
| CMTM3                         |                                       |
| CNN2                          |                                       |
| COBLL1                        |                                       |
| COL18A1                       |                                       |
| COL1A1                        |                                       |
| COL6A3                        |                                       |
| COQ10B                        |                                       |
| CPD                           |                                       |
| CREB3L2                       |                                       |
| CREM                          |                                       |
| CRIP1                         |                                       |
| CSF1R                         |                                       |
| CSF3R                         |                                       |
| CT55                          |                                       |
| CTSS                          |                                       |
| CXCL1                         |                                       |
| CXCL10                        |                                       |
| CXCL2                         |                                       |
| CYTH4                         |                                       |
| DNASE1L1                      |                                       |
| DYSF                          |                                       |
| ECM2                          |                                       |
| ECSCR                         |                                       |
| EFNA1                         |                                       |
| EGLN3                         |                                       |
| EGR3                          |                                       |
| EIF2AK2                       |                                       |
| ELK3                          | chr12:96,558,928-96,559,127           |

|          |                               |
|----------|-------------------------------|
| EMCN     |                               |
| EMID1    |                               |
| EMILIN1  |                               |
| EMP1     |                               |
| EMP3     |                               |
| ENPP3    |                               |
| ENTPD1   |                               |
| EPHB4    |                               |
| ERG      |                               |
| ESM1     |                               |
| ETS1     | chr11:128,199,311-128,199,510 |
| ETS2     |                               |
| F2       |                               |
| FZR      |                               |
| F3       |                               |
| FAM101B  |                               |
| FAM102B  |                               |
| FAM111A  |                               |
| FAM167B  |                               |
| FAM198B  |                               |
| FAM212A  |                               |
| FBP1     |                               |
| FBXO39   |                               |
| FCER1G   |                               |
| FCGR1A   |                               |
| FGD5     |                               |
| FHL2     |                               |
| FHOD1    |                               |
| FKBP9    |                               |
| FLI1     |                               |
| flt1     | chr13:28,975,622-28,975,821   |
| FOS      |                               |
| FOSL2    |                               |
| FOXC1    |                               |
| FOXF2    |                               |
| FUT4     |                               |
| GBP2     |                               |
| GBP4     |                               |
| GBP7     |                               |
| GCH1     |                               |
| GCHFR    |                               |
| GIMAP1   |                               |
| GIMAP4   |                               |
| GIMAP5   |                               |
| GIMAP6   |                               |
| GJA1     | chr6:121,733,082-121,733,281  |
| GMFG     |                               |
| GNB4     |                               |
| GNG11    | chr7:93,575,036-93,575,235    |
| GNG12    | chr1:68,190,690-68,190,889    |
| GPIHBP1  |                               |
| GPR182   |                               |
| GPR183   |                               |
| GRK5     |                               |
| HCLS1    |                               |
| HECW2    | chr2:197,229,893-197,230,092  |
| HELZ2    |                               |
| HHEX     |                               |
| HIGD1B   |                               |
| HLA-G    |                               |
| HLX      | chr1:221,050,031-221,050,230  |
| HPGD     |                               |
| HSPB8    |                               |
| HSPG2    | chr1:22,236,576-22,236,775    |
| HVCN1    |                               |
| IFI27    |                               |
| IGFBP3   |                               |
| IL10RB   |                               |
| IL13RA1  |                               |
| IL1B     | chr2:113,569,670-113,569,869  |
| IL1RL2   |                               |
| INPP5D   |                               |
| IPO11    |                               |
| IQGAP1   |                               |
| IRF8     |                               |
| IRX3     |                               |
| ITGA5    |                               |
| ITGA6    |                               |
| ITGAM    |                               |
| ITGB1    |                               |
| ITIHS    |                               |
| ITPR1    |                               |
| JADE2    |                               |
| KANK4    |                               |
| KCNE3    |                               |
| KCNK6    |                               |
| KCNQ1    |                               |
| KDELRL3  |                               |
| KIAA0040 | chr1:175,170,254-175,170,453  |
| KLF2     |                               |
| KLHL4    |                               |
| KLHL6    |                               |
| KLK8     |                               |
| LAMA5    |                               |
| LAMB1    |                               |
| LCP1     |                               |

|          |                              |
|----------|------------------------------|
| LCP2     |                              |
| LDB2     |                              |
| LDLRAP1  |                              |
| LEPR     |                              |
| LGALS3BP |                              |
| LITAF    |                              |
| LOXL2    |                              |
| LPP      | chr3:187,979,822-187,980,021 |
| LXN      |                              |
| LY8G     |                              |
| LY96     |                              |
| LYN      |                              |
| LYZ      |                              |
| MAN2A1   |                              |
| MAP2K3   |                              |
| MAP4K5   |                              |
| MARVELD2 |                              |
| MB21D1   |                              |
| MDFI     |                              |
| MDFIC    |                              |
| MECOM    |                              |
| MEF2C    |                              |
| MEOX1    |                              |
| MLKL     |                              |
| MMRN1    |                              |
| MMRN2    |                              |
| MOGAT2   |                              |
| MSN      |                              |
| MTMR11   |                              |
| MYCT1    |                              |
| MYH9     |                              |
| MYO18A   |                              |
| MYO1C    |                              |
| MYO1D    |                              |
| N4BP3    |                              |
| NEXN     |                              |
| NFATC1   | chr18:77,327,501-77,327,700  |
| NFKBIZ   |                              |
| NID1     | chr1:236,260,479-236,260,678 |
| NID2     | chr14:52,488,616-52,488,815  |
| NLRC3    |                              |
| NOSTRIN  |                              |
| NOX4     |                              |
| NTRK2    |                              |
| OPLAH    |                              |
| OTOR     |                              |
| P2RY6    |                              |
| PALMD    |                              |
| PARP14   |                              |
| PDGFB    |                              |
| PDGFRB   |                              |
| PF4      |                              |
| PHLDB2   |                              |
| PIEZO2   |                              |
| PLAC1    |                              |
| PLAUR    |                              |
| PLK2     | chr5:57,755,974-57,756,173   |
| PLP2     |                              |
| PLVAP    |                              |
| PPFIBP2  |                              |
| PRCP     |                              |
| PREX1    |                              |
| PRG1     |                              |
| PRICKLE3 |                              |
| PRKCH    |                              |
| PRND     |                              |
| PROCR    |                              |
| PRRG1    |                              |
| PRRG3    |                              |
| PTGS1    |                              |
| PTPN18   |                              |
| PXDC1    |                              |
| RAC2     |                              |
| RAD51AP1 |                              |
| RAPH1    |                              |
| RASGRP3  | chr2:33,661,286-33,661,485   |
| RBMS1    |                              |
| RCSO1    |                              |
| RELL1    |                              |
| RGL1     |                              |
| RGS1     |                              |
| RGS4     |                              |
| RGS5     |                              |
| RHBDL2   |                              |
| RHOJ     |                              |
| RIPK1    |                              |
| RIPK3    |                              |
| RNF125   |                              |
| RPS6KA1  |                              |
| RPS6KA3  |                              |
| RTP4     |                              |
| S100B    |                              |
| SDCBP2   |                              |
| SDPR     |                              |
| SEC24D   |                              |
| SERPINB6 | chr6:2,942,359-2,942,558     |

|           |                             |
|-----------|-----------------------------|
| SERPINE1  |                             |
| SGK3      |                             |
| SH3TC1    | chr4:8,193,164-8,193,363    |
| SHE       |                             |
| SLC16A4   |                             |
| SLC16A6   |                             |
| SLC19A3   |                             |
| SLC35D2   |                             |
| SLC39A8   |                             |
| SLC43A1   |                             |
| SLC43A3   |                             |
| SLCO2A1   |                             |
| SMAGP     |                             |
| SMPDL3B   |                             |
| SNAI2     |                             |
| SNAP23    |                             |
| SNX9      |                             |
| SOX17     | chr8:55,249,984-55,250,183  |
| SOX7      |                             |
| SPARCL1   |                             |
| SPATA13   |                             |
| SPATA6    |                             |
| SPRY1     |                             |
| SPTY2D1   |                             |
| ST3GAL6   |                             |
| ST8SIA4   |                             |
| STARD13   |                             |
| STC1      |                             |
| SYCP3     |                             |
| TCAF2     |                             |
| TCF15     |                             |
| TDRP      |                             |
| TES       |                             |
| TF        |                             |
| TFPI      |                             |
| TGFB1     |                             |
| TGFB1     |                             |
| TGFB2     |                             |
| THBD      |                             |
| THSD1     |                             |
| TIMP3     |                             |
| TLR2      |                             |
| TLR3      |                             |
| TM6SF1    |                             |
| TMEM88    |                             |
| TNFAIP8L1 |                             |
| TNFRSF11B |                             |
| TNFRSF1A  |                             |
| TNFSF10   |                             |
| TOR4A     |                             |
| TP53I11   |                             |
| TRIM16    |                             |
| TRIM27    |                             |
| TRPC6     |                             |
| TSPAN18   | chr11:44,839,646-44,839,845 |
| TSPAN2    |                             |
| TUBB6     |                             |
| TYROBP    |                             |
| UNC45B    |                             |
| UNC5B     |                             |
| UPP1      |                             |
| VANGL1    |                             |
| VIM       |                             |
| VIT       |                             |
| WDFY4     |                             |
| WIPF1     |                             |
| WLS       |                             |
| ZDHC20    | chr13:21,951,375-21,951,574 |
| ZFP36     |                             |
| ZFP69     |                             |

## **Supplemental Table 2**

Locations of statistically significant MEF2 binding peaks 200bp around tip-cell enriched genes (human genes orthologous to original mouse genes identified by Strasser et al., 2010).

| Human Gene Name (HUGO symbol) | Location of MEF2C binding peak |
|-------------------------------|--------------------------------|
| ESM1                          |                                |
| GCN1L1                        |                                |
| KAT6A                         |                                |
| TESC                          |                                |
| SDK1                          |                                |
| ADM                           |                                |
| CHST1                         |                                |
| SLC1A3                        |                                |
| SLC16A6                       |                                |
| GCA                           |                                |
| GRIN2B                        |                                |
| SYT16                         |                                |
| POGZ                          |                                |
| ANGPT2                        |                                |
| SEMA3A                        | chr7:83,753,706-83,753,905     |
| SNTG2                         |                                |
| PRKCZ                         |                                |
| PLCB1                         |                                |
| CXCR4                         |                                |
| PDHA1                         |                                |
| HOMER1                        |                                |
| IGF1                          |                                |
| KCNE3                         |                                |
| PPP2R5E                       |                                |
| SYNC                          |                                |
| SLC41A1                       |                                |
| VLDLR                         |                                |
| CDKN2B                        | chr9:22,008,630-22,008,829     |
| MAP2                          | chr2:210,390,640-210,390,839   |
| IGBP1                         |                                |
| IER3                          |                                |
| TRIP11                        |                                |
| AWAT2                         |                                |
| LPIN3                         |                                |
| VEGFA                         |                                |
| KCNK5                         |                                |
| SSH1                          | chr12:109,233,449-109,233,648  |
| DAPK2                         | chr15:64,187,840-64,188,039    |
| TRAPPC2                       |                                |
| RNF121                        |                                |
| GPR83                         |                                |
| IL1B                          | chr2:113,569,670-113,569,869   |
| ST8SIA3                       |                                |
| NDUFS4                        |                                |
| NUP160                        |                                |
| HSD17B2                       |                                |
| U2AF2                         |                                |
| LCP2                          |                                |
| FAM129A                       |                                |
| YTHDC2                        |                                |
| ZNRF2                         |                                |
| ITGAV                         |                                |
| COL2A1                        |                                |
| FNBP1L                        |                                |
| TCTA                          |                                |
| RSRC1                         |                                |
| BLCAP                         |                                |
| CCND2                         |                                |
| DCC                           |                                |
| KLF5                          |                                |
| MTOR                          |                                |
| PCSK6                         |                                |
| ITGB3                         |                                |
| CH25H                         |                                |
| RAB13                         |                                |
| DEDD                          |                                |
| PTPRO                         |                                |
| MFAP3L                        |                                |
| BMP7                          |                                |
| ARMC8                         |                                |
| PPP1R2                        |                                |
| CDR2                          |                                |
| GCNT1                         |                                |
| GLS2                          |                                |
| SAMD8                         |                                |
| ARHGAP18                      |                                |
| PPP3CC                        |                                |
| CFLAR                         |                                |

INTU  
RGMB  
ANXA6  
FBXO22  
FCHO1  
PRPSAP1  
IGFBP3  
CROT  
ME1  
TDG  
IGFBP4  
RHBDD2  
LYPLA1  
ATP1B1  
ATP6V1C2  
CUL2  
PDE4B  
HOXB5  
UBE4B  
DISP1  
KRT28  
SEMA3F  
HMGXB4  
RFXAP  
RABGAP1L  
NANOS1  
HCK  
FGF11  
IRF8  
MAPKBP1  
TK2  
ABR  
NUDT21  
LRRC16A  
IFT80  
P4HA1  
CCL25  
UGCG  
PKM  
S1PR2  
COPG1  
TUBA1A  
ACKR3  
CFHR1  
UBXN2A  
FPR2  
TP53111  
ZNF226

chr1:223,168,023-223,168,222
